# Supplementary material for: The effect of (H2O)n (n = 1–3) clusters on the reaction of HONO with HCl: a mechanistic and kinetic study
Source: Royal Society of Chemistry journal article supplement (doi:10.1039/d1cp05792h), 2022-01-01
Supplement: d1cp05792h1.pdf [file d1cp05792h1.pdf]

# Supporting information

-for-

## The effect of $(\text{H}_2\text{O})_n$ ( $n=1-3$ ) clusters on the reaction of HONO with HCl: mechanistic and kinetic study

Xiaoxia Zhao,<sup>a</sup> Zizhong Liu,<sup>\*a</sup> Ruisheng Zhao<sup>a</sup> and Tianzi Xu<sup>a</sup>

<sup>a</sup>Chemistry and Environment Science College, Inner Mongolia Normal University, Inner Mongolia Key Laboratory of Green Catalysis, Hohhot, Inner Mongolia 010022, China

### Figure Caption

|                 |                                                                                                                                                           |            |
|-----------------|-----------------------------------------------------------------------------------------------------------------------------------------------------------|------------|
| <b>Fig. S 1</b> | Optimized geometries calculated at the M06-2X/6-311+G (2df, 2p) level of theory for the reaction between HONO and HCl                                     | <b>pS2</b> |
| <b>Fig. S 2</b> | Optimized geometries calculated at the M06-2X/6-311+G (2df, 2p) level of theory for the reaction between HONO and HCl in the presence of a water molecule | <b>pS3</b> |
| <b>Fig. S 3</b> | Optimized geometries calculated at the M06-2X/6-311+G (2df, 2p) level of theory for the reaction between HONO and HCl in the presence of water dimer      | <b>pS4</b> |
| <b>Fig. S 4</b> | Optimized geometries calculated at the M06-2X/6-311+G (2df, 2p) level of theory for the reaction between HONO and HCl in the presence of water trimer     | <b>pS5</b> |
| <b>Fig. S 5</b> | Potential energy surface for the reaction HONO+HCl with water trimer at the CCSD(T)/aug-cc-pVTZ// M06-2X/6-311+G (2df,2p) level                           | <b>pS6</b> |
| <b>Fig. S 6</b> | Optimized geometries calculated at the M06-2X/6-311+G (2df, 2p) level of theory for the HONO+2HCl reaction                                                | <b>pS7</b> |
| <b>Fig. S 7</b> | Optimized geometries calculated at the M06-2X/6-311+G (2df, 2p) level of theory for the cis-HONO+trans-HONO+HCl reaction                                  | <b>pS7</b> |

### Table Caption

|                 |                                                                                                                                                                                                                                                                                                                                 |            |
|-----------------|---------------------------------------------------------------------------------------------------------------------------------------------------------------------------------------------------------------------------------------------------------------------------------------------------------------------------------|------------|
| <b>Table S1</b> | The imaginary frequencies ( $\text{cm}^{-1}$ ) of transition states calculated at the M06-2X/6-311+G (2df, 2p) level of theory for HONO+HCl reactions without and with catalyst                                                                                                                                                 | <b>pS7</b> |
| <b>Table S2</b> | Values of relative energies ( $\Delta E$ with and without out ZPE/( $\text{kcal}\cdot\text{mol}^{-1}$ )), enthalpy ( $\Delta H$ (298K)/( $\text{kcal}\cdot\text{mol}^{-1}$ )), and Gibbs free energy ( $\Delta G$ (298K)/( $\text{kcal}\cdot\text{mol}^{-1}$ )) for the HONO+HCl reaction                                       | <b>pS8</b> |
| <b>Table S3</b> | Values of relative energies ( $\Delta E$ with and without out ZPE/( $\text{kcal}\cdot\text{mol}^{-1}$ )), enthalpy ( $\Delta H$ (298K)/( $\text{kcal}\cdot\text{mol}^{-1}$ )), and Gibbs free energy ( $\Delta G$ (298K)/( $\text{kcal}\cdot\text{mol}^{-1}$ )) for the HONO+HCl+ $\text{H}_2\text{O}$ reaction                 | <b>pS8</b> |
| <b>Table S4</b> | Values of relative energies ( $\Delta E$ with and without out ZPE/( $\text{kcal}\cdot\text{mol}^{-1}$ )), enthalpy ( $\Delta H$ (298K)/( $\text{kcal}\cdot\text{mol}^{-1}$ )), and Gibbs free energy ( $\Delta G$ (298K)/( $\text{kcal}\cdot\text{mol}^{-1}$ )) for the HONO+HCl+( $\text{H}_2\text{O}$ ) <sub>2</sub> reaction | <b>pS9</b> |
| <b>Table S5</b> | Values of relative energies ( $\Delta E$ with and without out ZPE/( $\text{kcal}\cdot\text{mol}^{-1}$ )), enthalpy ( $\Delta H$ (298K)/( $\text{kcal}\cdot\text{mol}^{-1}$ )), and Gibbs free energy ( $\Delta G$ (298K)/( $\text{kcal}\cdot\text{mol}^{-1}$ )) for the HONO+HCl+( $\text{H}_2\text{O}$ ) <sub>3</sub>          | <b>pS8</b> |

|                  | reaction                                                                                                                                                                                                                                              |             |
|------------------|-------------------------------------------------------------------------------------------------------------------------------------------------------------------------------------------------------------------------------------------------------|-------------|
| <b>Table S6</b>  | Values of relative energies ( $\Delta E$ with and without out ZPE/(kcal·mol <sup>-1</sup> )), enthalpy ( $\Delta H(298K)$ /(kcal·mol <sup>-1</sup> ), and Gibbs free energy ( $\Delta G(298K)$ /(kcal·mol <sup>-1</sup> )) for the HONO+2HCl reaction | <b>pS8</b>  |
| <b>Table S7</b>  | Values of relative energies ( $\Delta E$ with and without out ZPE/(kcal·mol <sup>-1</sup> )), enthalpy ( $\Delta H(298K)$ /(kcal·mol <sup>-1</sup> ), and Gibbs free energy ( $\Delta G(298K)$ /(kcal·mol <sup>-1</sup> )) for the 2HONO+HCl reaction | <b>pS8</b>  |
| <b>Table S8</b>  | The equilibrium constants of the relevant complexes HONO···(H <sub>2</sub> O) <sub>n</sub> (n=1-3) and HCl···(H <sub>2</sub> O) <sub>n</sub> (n=1-3) at 298K (cm <sup>3</sup> molecule <sup>-1</sup> )                                                | <b>pS9</b>  |
| <b>Table S9</b>  | The temperature T <sub>C1</sub> of the optimal reaction path under different reaction conditions                                                                                                                                                      | <b>pS11</b> |
| <b>Table S10</b> | Rate constants (in cm <sup>3</sup> molecule <sup>-1</sup> s <sup>-1</sup> ) for the HONO+HCl reaction under different conditions with two methods (298K).                                                                                             | <b>pS12</b> |

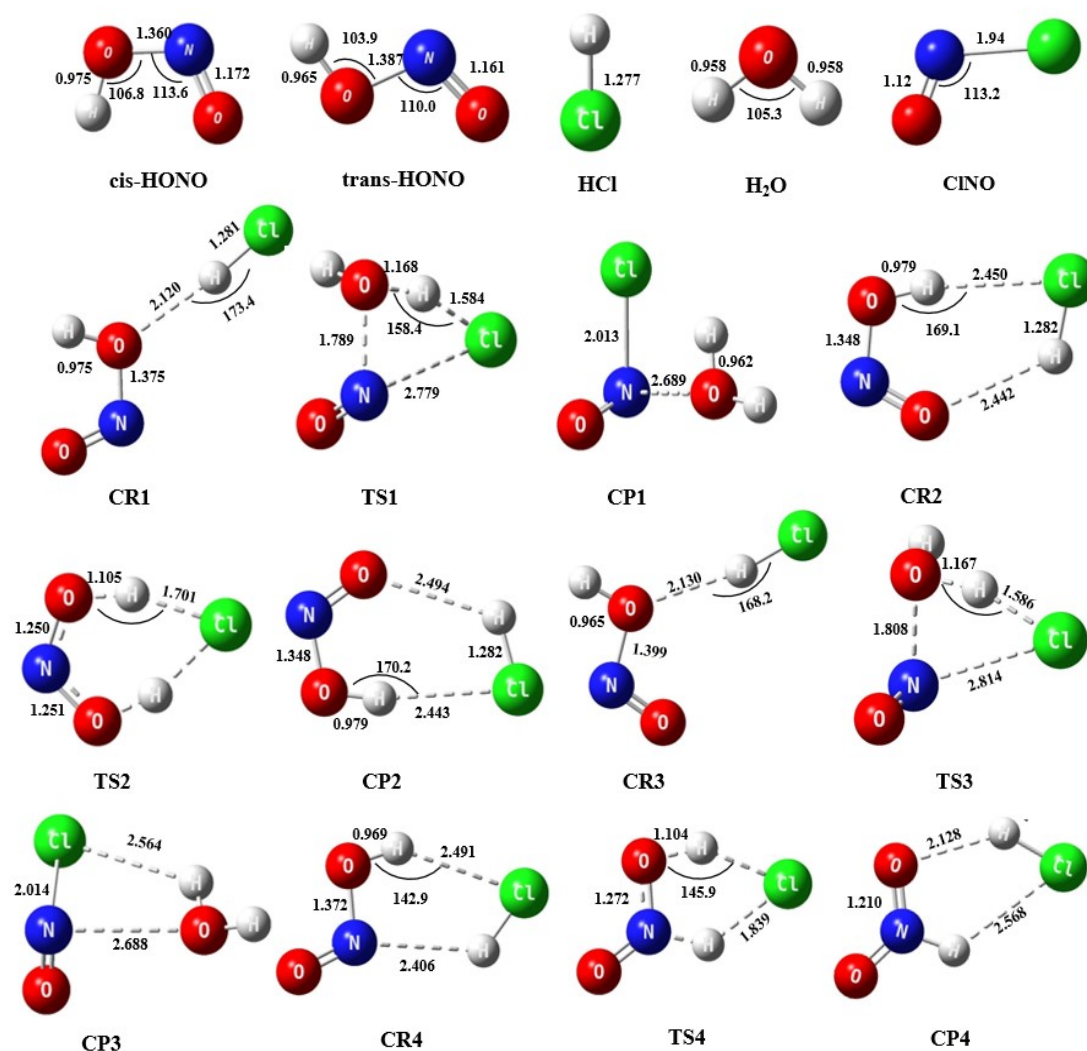

**Fig. S 1** Optimized geometries calculated at the M06-2X/6-311+G (2df, 2p) level of theory for the reaction between HONO and HCl

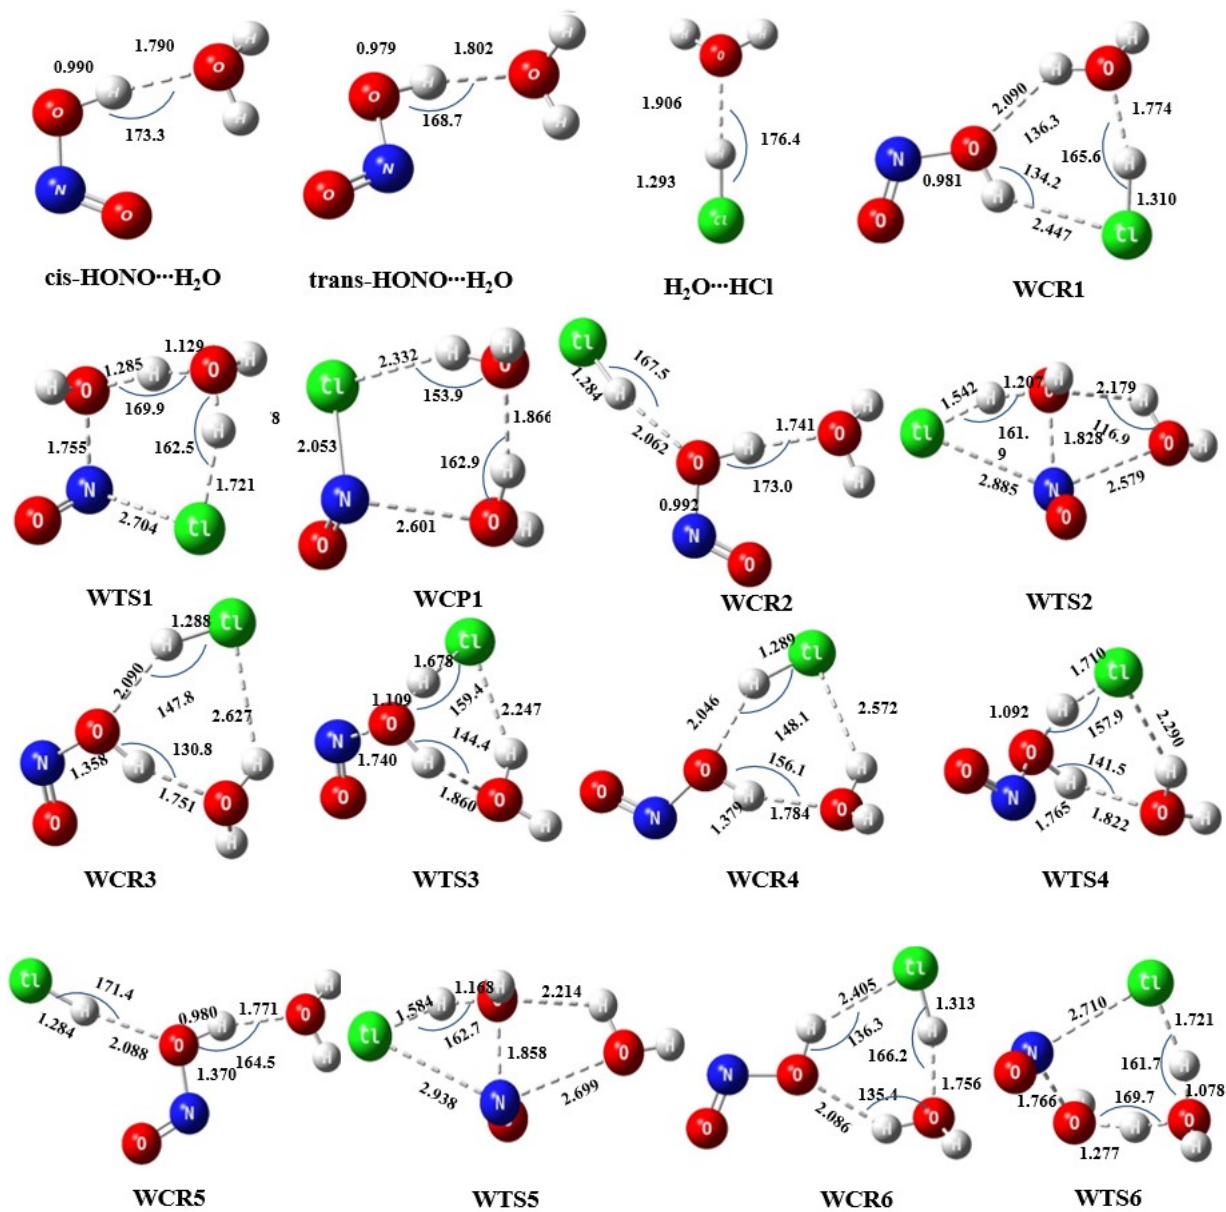

Fig. S 2 Optimized geometries calculated at the M06-2X/6-311+G (2df, 2p) level of theory for the reaction between HONO and HCl in the presence of a water molecule

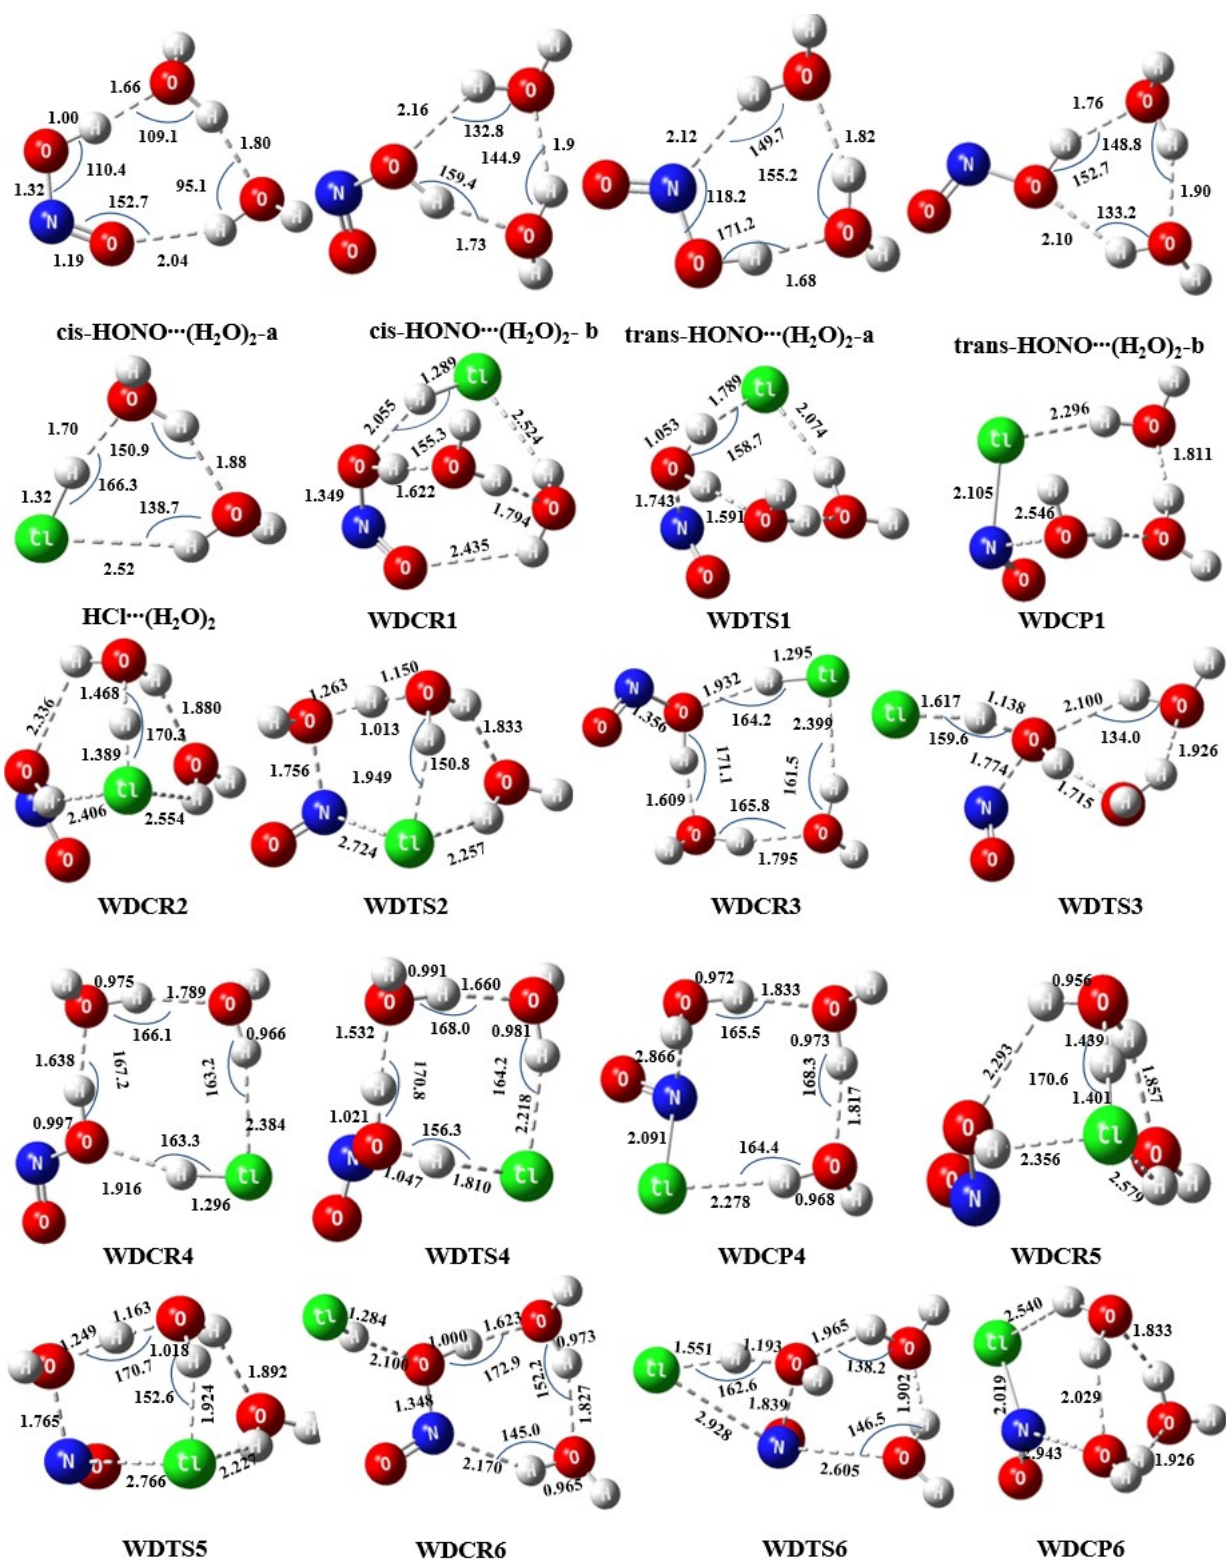

Fig. S 3 Optimized geometries calculated at the M06-2X/6-311+G (2df, 2p) level of theory for the reaction between HONO and HCl in the presence of water dimer



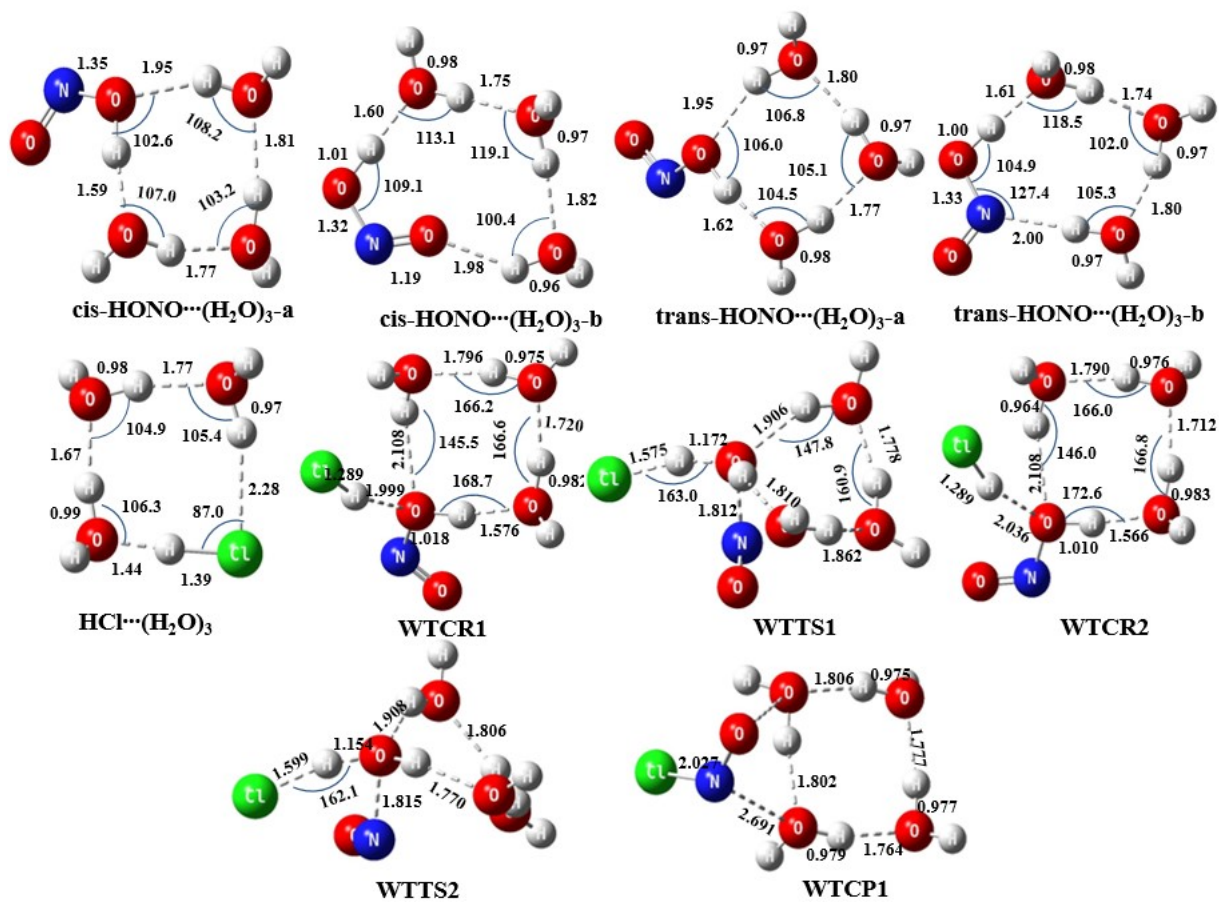

Fig. S 4 Optimized geometries calculated at the M06-2X/6-311+G (2df, 2p) level of theory for the reaction between HONO and HCl in the presence of water trimer

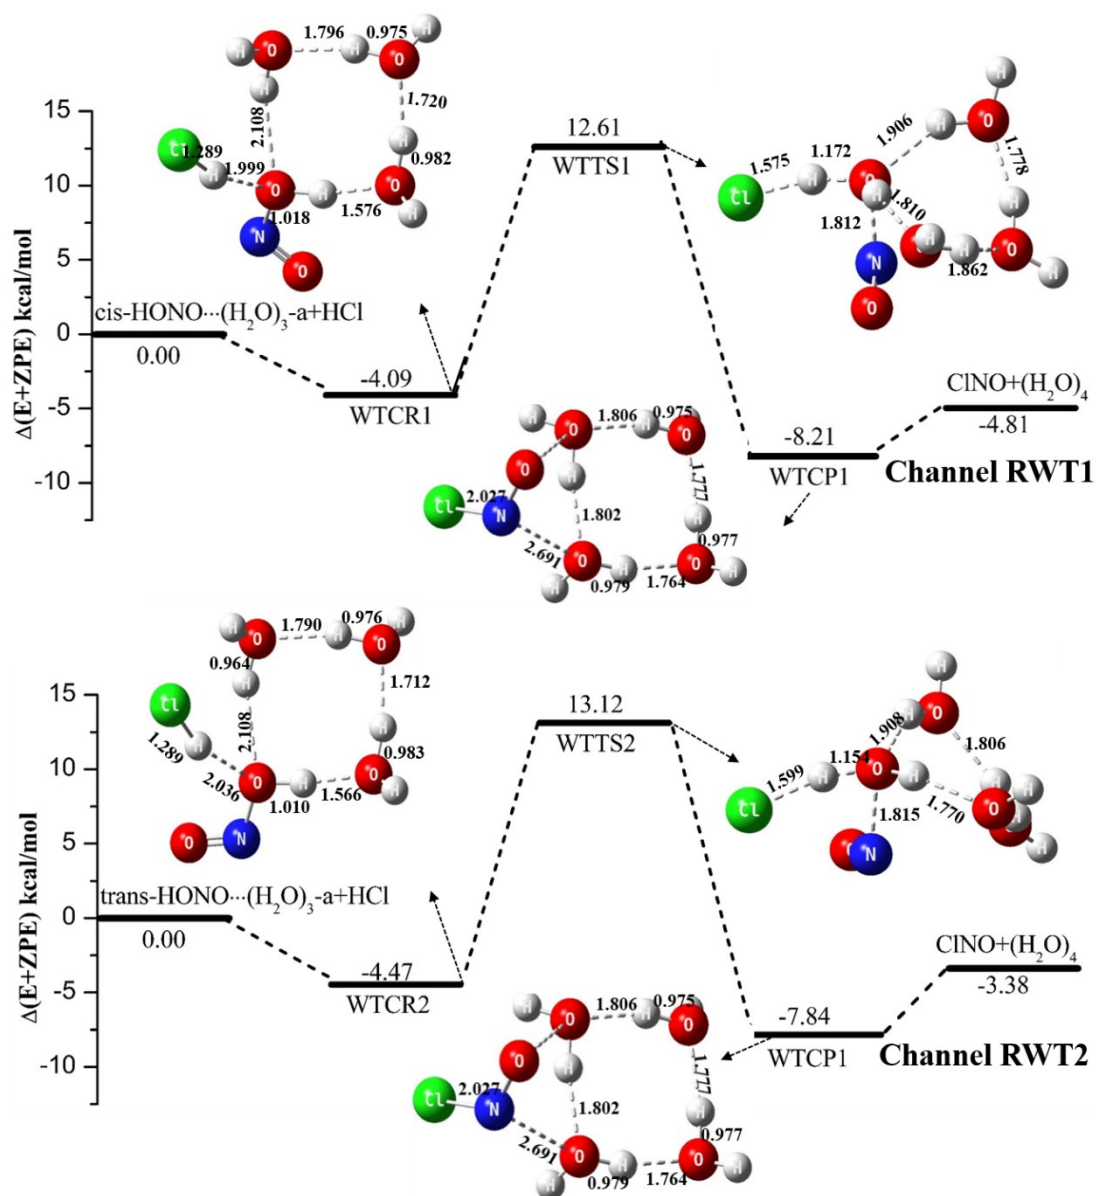

Fig. S5 Potential energy surface for the reaction HONO+HCl with water trimer at the CCSD(T)/aug-cc-pVTZ// M06-2X/6-311+G (2df,2p) level

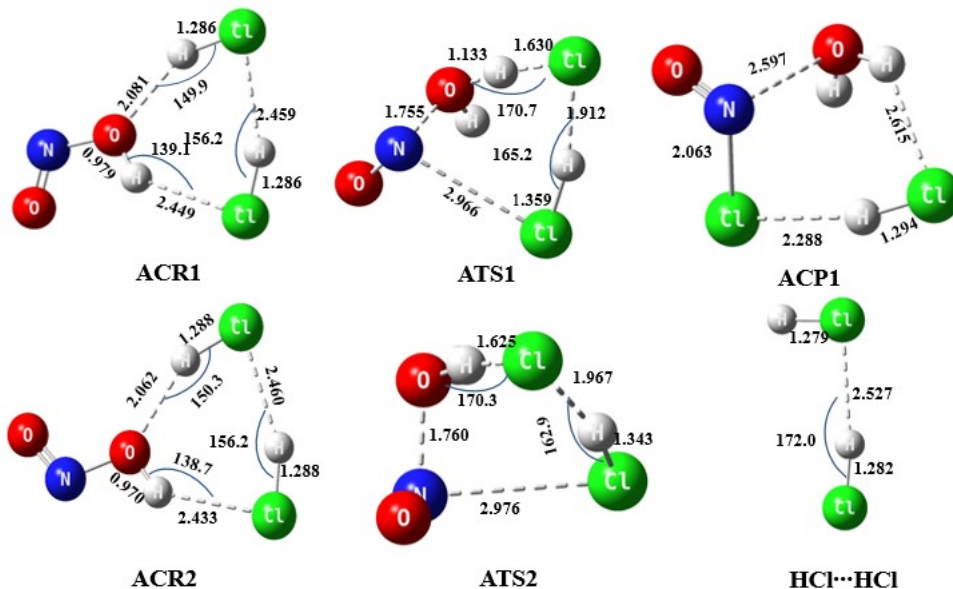

Fig. S 6 Optimized geometries calculated at the M06-2X/6-311+G (2df, 2p) level of theory for the HONO+2HCl reaction

### cis-HONO+trans-HONO+HCl

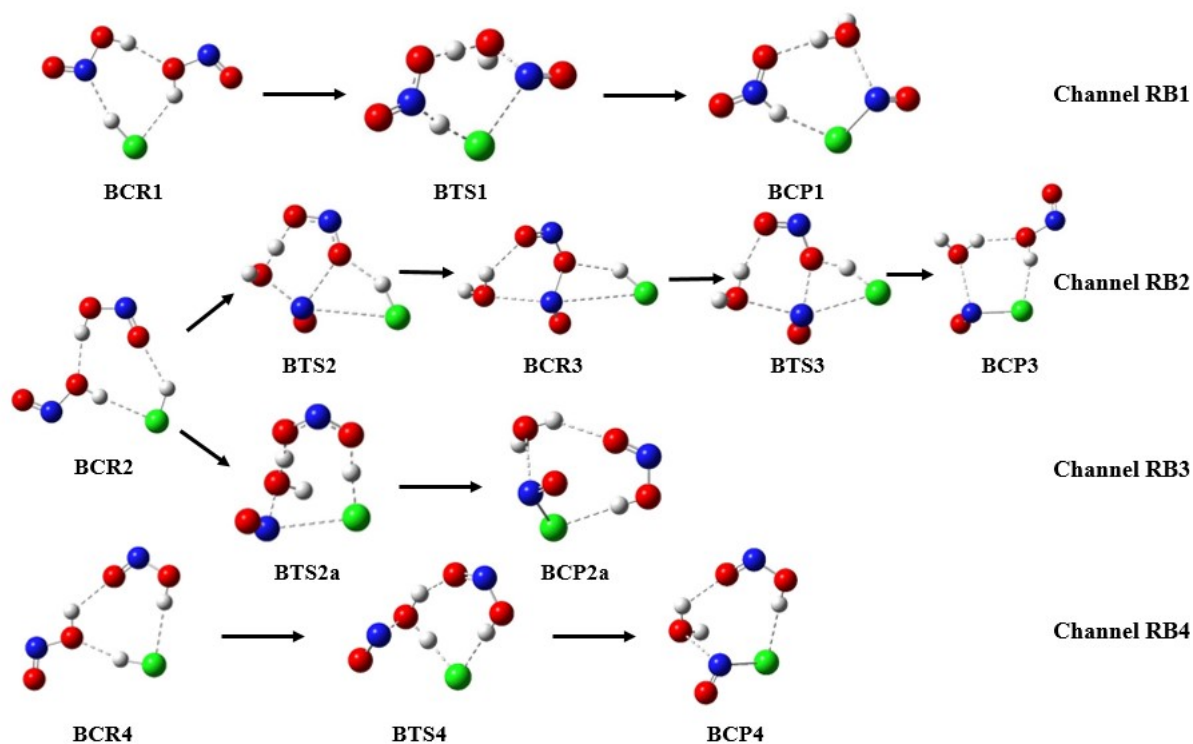

Fig. S 7 Optimized geometries calculated at the M06-2X/6-311+G (2df, 2p) level of theory for the cis-HONO+trans-HONO+HCl reaction

Table S1 The imaginary frequencies ( $\text{cm}^{-1}$ ) of transition states calculated at the M06-2X/6-311+G (2df, 2p) level of theory for HONO+HCl reactions without and with catalyst

| Species | Imaginary frequency | Species | Imaginary frequency |
|---------|---------------------|---------|---------------------|
| TS1     | 796.06i             | WDTS4   | 174.98i             |
| TS2     | 549.32i             | WDTS5   | 517.96i             |

|       |         |       |          |
|-------|---------|-------|----------|
| TS3   | 734.53i | WDTS6 | 528.79i  |
| TS4   | 689.87i | WTTS1 | 553.96i  |
| WTS1  | 548.63i | WTTS2 | 439.90i  |
| WTS2  | 751.27i | ATS1  | 239.55i  |
| WTS3  | 234.28i | ATS2  | 267.38i  |
| WTS4  | 314.89i | BTS1  | 892.61i  |
| WTS5  | 621.63i | BTS2  | 512.72i  |
| WTS6  | 601.91i | BTS2a | 1010.09i |
| WDTS1 | 116.33i | BTS3  | 363.66i  |
| WDTS2 | 465.85i | BTS4  | 208.50i  |
| WDTS3 | 498.54i |       |          |

**Table S2** Values of relative energies ( $\Delta E$  with and without out ZPE/(kcal·mol<sup>-1</sup>)), enthalpy ( $\Delta H$  (298K)/(kcal·mol<sup>-1</sup>)), and Gibbs free energy ( $\Delta G$ (298K)/(kcal·mol<sup>-1</sup>)) for the HONO+HCl reaction

| System                | $\Delta E$ | $\Delta(E+ZPE)$ | $\Delta H$ | $\Delta G$ |
|-----------------------|------------|-----------------|------------|------------|
| cis-HONO+HCl          | 0.46       | 0.39            | 0.35       | 0.39       |
| CR1                   | -2.43      | -1.45           | -1.53      | 5.01       |
| TS1                   | 16.79      | 16.73           | 15.70      | 25.11      |
| CP1                   | -8.91      | -6.87           | -6.70      | 0.18       |
| CR2                   | -2.77      | -1.41           | -1.68      | 5.75       |
| TS2                   | 13.43      | 13.91           | 12.26      | 23.34      |
| CP2                   | -2.76      | -1.35           | -1.67      | 5.91       |
| trans-HONO+HCl        | 0.00       | 0.00            | 0.00       | 0.00       |
| CR3                   | -3.20      | -2.22           | -2.29      | 4.20       |
| TS3                   | 14.27      | 14.24           | 13.22      | 22.63      |
| CP3                   | -8.92      | -6.96           | -6.74      | 0.01       |
| CR4                   | -3.44      | -2.12           | -2.34      | 4.97       |
| TS4                   | 18.26      | 19.63           | 18.06      | 28.60      |
| CP4                   | 3.26       | 5.47            | 5.08       | 12.88      |
| CINO+H <sub>2</sub> O | -4.23      | -3.95           | -3.54      | -4.65      |
| HNO <sub>2</sub> +HCl | 8.25       | 9.25            | 9.11       | 9.76       |

**Table S3** Values of relative energies ( $\Delta E$  with and without out ZPE/(kcal·mol<sup>-1</sup>)), enthalpy ( $\Delta H$  (298K)/(kcal·mol<sup>-1</sup>)), and Gibbs free energy ( $\Delta G$ (298K)/(kcal·mol<sup>-1</sup>)) for the HONO+HCl+H<sub>2</sub>O reaction

| System                               | $\Delta E$ | $\Delta(E+ZPE)$ | $\Delta H$ | $\Delta G$ |
|--------------------------------------|------------|-----------------|------------|------------|
| H <sub>2</sub> O···HCl+cis-HONO      | 0.00       | 0.00            | 0.00       | 0.00       |
| WCR1                                 | -6.28      | -4.91           | -5.03      | 4.50       |
| WTS1                                 | 11.91      | 12.71           | 11.27      | 24.30      |
| WCP1                                 | -12.18     | -9.59           | -9.24      | -0.28      |
| CINO+(H <sub>2</sub> O) <sub>2</sub> | -4.40      | -3.54           | 0.31       | -4.30      |
| HCl+cis-HONO···H <sub>2</sub> O      | 0.00       | 0.00            | 0.00       | 0.00       |
| WCR2                                 | -3.88      | -2.44           | -2.75      | 4.66       |
| WTS2                                 | 16.94      | 16.56           | 15.70      | 25.26      |
| WCP1                                 | -10.16     | -7.93           | -7.79      | -0.55      |
| WCR3                                 | -4.55      | -3.56           | -3.74      | 3.34       |
| WTS3                                 | 9.55       | 10.92           | 9.61       | 20.30      |
| WCP1                                 | -9.35      | -6.89           | -6.90      | 0.83       |
| CINO+(H <sub>2</sub> O) <sub>2</sub> | -2.20      | -1.59           | 2.00       | -4.31      |
| trans-HONO···H <sub>2</sub> O+HCl    | 0.00       | 0.00            | 0.00       | 0.00       |
| WCR4                                 | -5.35      | -4.44           | -4.60      | 2.84       |
| WTS4                                 | 8.40       | 9.64            | 8.40       | 18.83      |
| WCR5                                 | -4.20      | -3.27           | -3.33      | 3.32       |
| WTS5                                 | 15.66      | 15.06           | 14.34      | 23.39      |
| WCP1                                 | -9.64      | -7.61           | -7.50      | -0.32      |
| CINO+(H <sub>2</sub> O) <sub>2</sub> | -1.79      | -1.44           | 2.15       | -4.17      |



|                                      |        |       |       |       |
|--------------------------------------|--------|-------|-------|-------|
| H <sub>2</sub> O⋯HCl+trans-HONO      | 0.00   | 0.00  | 0.00  | 0.00  |
| WCR6                                 | -6.92  | -5.35 | -5.59 | 4.36  |
| WTS6                                 | 10.94  | 11.70 | 10.20 | 23.38 |
| WCP1                                 | -11.83 | -9.18 | -8.96 | 0.47  |
| CINO+(H <sub>2</sub> O) <sub>2</sub> | -3.94  | -3.16 | 0.66  | -3.90 |

**Table S4** Values of relative energies ( $\Delta E$  with and without out ZPE/(kcal·mol<sup>-1</sup>)), enthalpy ( $\Delta H$  (298K)/(kcal·mol<sup>-1</sup>)), and Gibbs free energy ( $\Delta G$ (298K)/(kcal·mol<sup>-1</sup>)) for the HONO+HCl+(H<sub>2</sub>O)<sub>2</sub> reaction

| System                                            | $\Delta E$ | $\Delta(E+ZPE)$ | $\Delta H$ | $\Delta G$ |
|---------------------------------------------------|------------|-----------------|------------|------------|
| cis-HONO⋯(H <sub>2</sub> O) <sub>2</sub> -a+HCl   | 0.00       | 0.00            | 0.00       | 0.00       |
| WDCR1                                             | -4.25      | -3.34           | -3.49      | 4.12       |
| WDTS1                                             | 4.80       | 6.66            | 5.30       | 16.42      |
| WDCP1                                             | -8.23      | -5.92           | -5.73      | 1.71       |
| CINO+(H <sub>2</sub> O) <sub>3</sub>              | -3.78      | -2.44           | -2.60      | -4.79      |
| cis-HONO+HCl⋯(H <sub>2</sub> O) <sub>2</sub>      | 0.00       | 0.00            | 0.00       | 0.00       |
| WDCR2                                             | -4.23      | -3.12           | -3.10      | 7.38       |
| WDTS2                                             | 6.78       | 8.18            | 7.19       | 19.96      |
| WDCP1                                             | -11.14     | -8.72           | -7.92      | 0.47       |
| CINO+(H <sub>2</sub> O) <sub>3</sub>              | -6.83      | -5.30           | -5.02      | -5.44      |
| cis-HONO⋯(H <sub>2</sub> O) <sub>2</sub> -b+HCl   | 0.00       | 0.00            | 0.00       | 0.00       |
| WDCR3                                             | -7.40      | -6.17           | -6.64      | 1.60       |
| WDTS3                                             | 13.06      | 13.19           | 12.39      | 21.34      |
| WDCP1                                             | -10.90     | -8.03           | -8.20      | 0.41       |
| CINO+(H <sub>2</sub> O) <sub>3</sub>              | -5.55      | -3.99           | -4.36      | -5.90      |
| trans-HONO⋯(H <sub>2</sub> O) <sub>2</sub> -b+HCl | 0.00       | 0.00            | 0.00       | 0.00       |
| WDCR4                                             | -5.93      | -4.81           | -5.08      | 3.03       |
| WDTS4                                             | 2.90       | 5.24            | 3.56       | 15.08      |
| WDCP4                                             | -9.51      | -6.84           | -6.94      | 0.73       |
| CINO+(H <sub>2</sub> O) <sub>3</sub>              | -4.32      | -2.75           | -3.20      | -4.60      |
| trans-HONO+HCl⋯(H <sub>2</sub> O) <sub>2</sub>    | 0.00       | 0.00            | 0.00       | 0.00       |
| WDCR5                                             | -4.69      | -3.17           | -3.27      | 7.30       |
| WDTS5                                             | 5.70       | 7.32            | 6.12       | 19.69      |
| WDCP1                                             | -10.79     | -8.52           | -7.76      | 1.00       |
| CINO+(H <sub>2</sub> O) <sub>3</sub>              | -6.37      | -4.91           | -4.66      | -5.06      |
| trans-HONO⋯(H <sub>2</sub> O) <sub>2</sub> -a+HCl | 0.00       | 0.00            | 0.00       | 0.00       |
| WDCR6                                             | -3.72      | -2.92           | -2.90      | 3.64       |
| WDTS6                                             | 15.64      | 15.22           | 14.47      | 23.95      |
| WDCP6                                             | -7.95      | -5.78           | -5.62      | 1.53       |
| CINO+(H <sub>2</sub> O) <sub>3</sub>              | -2.42      | -1.42           | -1.55      | -3.94      |

**Table S5** Values of relative energies ( $\Delta E$  with and without out ZPE/(kcal·mol<sup>-1</sup>)), enthalpy ( $\Delta H$  (298K)/(kcal·mol<sup>-1</sup>)), and Gibbs free energy ( $\Delta G$ (298K)/(kcal·mol<sup>-1</sup>)) for the HONO+HCl+(H<sub>2</sub>O)<sub>3</sub> reaction

| System                                            | $\Delta E$ | $\Delta(E+ZPE)$ | $\Delta H$ | $\Delta G$ |
|---------------------------------------------------|------------|-----------------|------------|------------|
| cis-HONO⋯(H <sub>2</sub> O) <sub>3</sub> -a+HCl   | 0.00       | 0.00            | 0.00       | 0.00       |
| WTCR1                                             | -5.03      | -4.09           | -4.26      | 3.63       |
| WTTS1                                             | 12.57      | 12.61           | 11.87      | 22.06      |
| WTCP1                                             | -11.21     | -8.21           | -8.32      | 0.08       |
| CINO+(H <sub>2</sub> O) <sub>4</sub>              | -6.55      | -4.81           | -5.20      | -6.85      |
| trans-HONO⋯(H <sub>2</sub> O) <sub>3</sub> -a+HCl | 0.00       | 0.00            | 0.00       | 0.00       |
| WTCR2                                             | -5.45      | -4.47           | -4.69      | 3.44       |
| WTTS2                                             | 12.96      | 13.12           | 12.30      | 22.47      |
| WTCP1                                             | -10.57     | -7.84           | -8.02      | 0.91       |
| CINO+(H <sub>2</sub> O) <sub>4</sub>              | -5.05      | -3.38           | -3.87      | -5.29      |

**Table S6** Values of relative energies ( $\Delta E$  with and without out ZPE/(kcal·mol<sup>-1</sup>)), enthalpy ( $\Delta H$ (298K)/(kcal·mol<sup>-1</sup>)), and Gibbs free energy ( $\Delta G$ (298K)/(kcal·mol<sup>-1</sup>)) for the HONO+2HCl reaction

| System                      | $\Delta E$ | $\Delta(E+ZPE)$ | $\Delta H$ | $\Delta G$ |
|-----------------------------|------------|-----------------|------------|------------|
| cis-HONO+HCl $\cdots$ HCl   | 0.46       | 0.39            | 0.35       | 0.39       |
| ACR1                        | -5.53      | -4.94           | -4.72      | 4.40       |
| ATS1                        | 9.05       | 8.90            | 7.95       | 20.25      |
| ACP1                        | -11.74     | -10.11          | -9.54      | -0.61      |
| trans-HONO+HCl $\cdots$ HCl | 0.00       | 0.00            | 0.00       | 0.00       |
| ACR2                        | -6.60      | -5.84           | -5.64      | 3.27       |
| ATS2                        | 5.68       | 5.83            | 4.85       | 17.30      |
| CINO+HCl+H <sub>2</sub> O   | -2.07      | -3.45           | -2.37      | -9.50      |

**Table S7** Values of relative energies ( $\Delta E$  with and without out ZPE/(kcal·mol<sup>-1</sup>), enthalpy ( $\Delta H(298K)$ /(kcal·mol<sup>-1</sup>), and Gibbs free energy ( $\Delta G(298K)$ /(kcal·mol<sup>-1</sup>)) for the 2HONO+HCl reaction

| System                                  | $\Delta E$ | $\Delta(E+ZPE)$ | $\Delta H$ | $\Delta G$ |
|-----------------------------------------|------------|-----------------|------------|------------|
| cis-HONO+trans-HONO+HCl                 | 0.00       | 0.00            | 0.00       | 0.00       |
| BCR1                                    | -10.48     | -8.07           | -8.12      | 8.76       |
| BTS1                                    | 10.11      | 10.67           | 9.42       | 30.20      |
| BCP1                                    | -10.78     | -6.43           | -6.19      | 10.34      |
| HNO <sub>2</sub> +CINO+H <sub>2</sub> O | 3.56       | 4.92            | 5.22       | 4.72       |
| BCR2                                    | -10.11     | -7.95           | -7.79      | 8.68       |
| BTS2                                    | 8.96       | 8.86            | 8.11       | 27.12      |
| BCR3                                    | -3.04      | -2.59           | -1.88      | 14.04      |
| BTS3                                    | 7.12       | 7.37            | 6.88       | 26.11      |
| BCP3                                    | -16.64     | -13.52          | -13.02     | 3.02       |
| trans-HONO+CINO+H <sub>2</sub> O        | -4.69      | -4.33           | -3.89      | -5.05      |
| BTS2a                                   | 11.38      | 10.74           | 9.63       | 29.88      |
| BCP2a                                   | -14.20     | -11.10          | -11.16     | 6.85       |
| BCR4                                    | -9.54      | -7.29           | -7.18      | 8.77       |
| BTS4                                    | 1.44       | 3.76            | 2.93       | 21.93      |
| BCP4                                    | -14.20     | -11.10          | -11.16     | 6.85       |
| cis-HONO+CINO+H <sub>2</sub> O          | -4.23      | -3.95           | -3.54      | -4.65      |

**Table S8** The equilibrium constants of the relevant complexes HONO $\cdots$ (H<sub>2</sub>O)<sub>n</sub>(n=1-3) and HCl $\cdots$ (H<sub>2</sub>O)<sub>n</sub>(n=1-3) at 298K (cm<sup>3</sup> molecule<sup>-1</sup>)

| Species                                              | Equilibrium constants  | Species                                                | Equilibrium constants  |
|------------------------------------------------------|------------------------|--------------------------------------------------------|------------------------|
| HCl $\cdots$ H <sub>2</sub> O                        | $1.34 \times 10^{-21}$ | trans-HONO $\cdots$ (H <sub>2</sub> O) <sub>2</sub> -a | $1.97 \times 10^{-22}$ |
| cis-HONO $\cdots$ H <sub>2</sub> O                   | $1.27 \times 10^{-21}$ | trans-HONO $\cdots$ (H <sub>2</sub> O) <sub>2</sub> -b | $6.53 \times 10^{-23}$ |
| trans-HONO $\cdots$ H <sub>2</sub> O                 | $8.42 \times 10^{-22}$ | cis-HONO $\cdots$ (H <sub>2</sub> O) <sub>3</sub> -a   | $1.96 \times 10^{-23}$ |
| (H <sub>2</sub> O) <sub>2</sub>                      | $3.83 \times 10^{-22}$ | cis-HONO $\cdots$ (H <sub>2</sub> O) <sub>3</sub> -b   | $4.65 \times 10^{-24}$ |
| cis-HONO $\cdots$ (H <sub>2</sub> O) <sub>2</sub> -a | $9.06 \times 10^{-23}$ | HCl $\cdots$ (H <sub>2</sub> O) <sub>3</sub>           | $9.10 \times 10^{-24}$ |
| cis-HONO $\cdots$ (H <sub>2</sub> O) <sub>2</sub> -b | $1.39 \times 10^{-23}$ | trans-HONO $\cdots$ (H <sub>2</sub> O) <sub>3</sub> -a | $1.42 \times 10^{-22}$ |
| HCl $\cdots$ (H <sub>2</sub> O) <sub>2</sub>         | $2.95 \times 10^{-23}$ | trans-HONO $\cdots$ (H <sub>2</sub> O) <sub>3</sub> -b | $1.78 \times 10^{-23}$ |
| (H <sub>2</sub> O) <sub>3</sub>                      | $5.93 \times 10^{-23}$ |                                                        |                        |

## 1. The proof that $k_1$ is much larger than $k_2$ in the calculation formula

In this paper, we used the equilibrium-state model and the steady-state model to obtain the reaction rate constant. The equilibrium-state model can only be applied when the condition of equilibrium-state approximation satisfies, i.e., both the forward reaction and the backward reaction of the first step are fast relative to the second reaction step ( $k_1, k_{-1} \gg k_2$ ). Xiao et al. study<sup>[1]</sup> showed that  $k_1$  is less than  $k_2$  at low temperatures and hence the equilibrium-state model is not applicable. With the temperature increasing, the Gibbs free energy of the reaction complex increases, making  $k_1$  increase and  $k_1 \gg k_2$  and hence the equilibrium-state model is applicable at high temperatures. In the steady-state model, it is assumed that the

concentration of the reaction complex as an active intermediate remains constant during the reaction and the application condition of the steady-state model is that the consuming process of the reaction complex is much faster than the forming process of the reaction complex. At low temperatures,  $k_1 > k_{-1}$  and  $k_1 > k_2$ ; hence, the steady-state model is not applicable at low temperatures, but at high temperatures. Finally, the problem is to determine the temperature at which the equilibrium-state model and the steady-state model satisfy their approximate conditions.

According to the thermodynamic theory, the standard molar Gibbs free energy change  $\Delta G_{1,m}^\theta$  for the formation reaction of the reaction complex can be expressed as

$$\Delta G_{1,m}^\theta = \Delta H_{1,m}^\theta - T\Delta S_{1,m}^\theta = -RT \ln K_1^\theta \quad (1)$$

where  $\Delta H_{1,m}^\theta$  is the standard enthalpy change,  $\Delta S_{1,m}^\theta$  is the standard entropy change, and  $K_1^\theta$  is the standard equilibrium constant between the original reactants and the reaction complex. The standard equilibrium constant  $K_1^\theta$  can be written as

$$K_1^\theta = K_{c,1} \left( \frac{RT}{P^\theta} \right)^{-1} \quad (2)$$

where  $P^\theta$  is the standard atmospheric pressure,  $R$  is the ideal gas constant, and  $K_{c,1}$  is the concentration equilibrium constant between the original reactants and the reaction complex. The expression for the concentration equilibrium constant  $K_{c,1}$  can also be written as

$$K_{c,1} = \frac{k_1}{k_{-1}} \quad (3)$$

The enthalpy change and the entropy change are negative in the formation of the reaction complex, and therefore, from eq 7, the entropy term is not dominant if  $T$  is low and hence the standard molar Gibbs free energy  $\Delta G_{1,m}^\theta$  is less than zero at low temperatures, which leads to a  $k_1$  value that is larger than  $k_{-1}$ . With the increase of temperature,  $\Delta G_{1,m}^\theta$  is increasing to zero and the corresponding temperature is defined as the conversion temperature  $T_{C1}$  in this study

$$\Delta G_{1,m}^\theta = \Delta H_{1,m}^\theta - T_{C,1}\Delta S_{1,m}^\theta = 0 \quad (4)$$

When the temperature is much higher than  $T_{C1}$ ,  $\Delta G_{1,m}^\theta$  is much greater than zero, which leads to that  $k_{-1}$  are larger than  $k_1$  and  $k_1$  and  $k_{-1}$  are larger than  $k_2$  at higher temperatures, and hence, the steady-state model and the equilibrium-state model are applicable for the radical molecule reactions when the temperature is much higher than  $T_{C1}$ .

According to Equation 4, we calculate  $T_{C1}$  of the optimal reaction path under different reaction conditions, and the calculation results are shown in Table S1. In our study, the temperature range for calculating the reaction rate constant is 240-425K, which is higher than the temperature in **Table S9**. So we think it's right to assume that  $k_2$  is much less than  $k_{-1}$ ,

i.e.  $k_{-1} + k_2 \approx k_{-1}$ , so that  $k = \frac{k_1}{k_{-1} + k_2} k_2$  is approximate to  $k = \frac{k_1}{k_{-1}} k_2 = k_{eq} k_2$ , the fact that results of our approximate calculation approximates to that of an exact calculation (KiStHeLP) also shows that our approximation is reasonable (see **Table S10**).

. **Table S9** The temperature  $T_{C1}$  of the optimal reaction path under different reaction conditions

| Reaction conditions | reaction     | $T_{C1}$ (K) |
|---------------------|--------------|--------------|
| No water            | cis-HONO+HCl | 86           |

|                    |                                                     |     |
|--------------------|-----------------------------------------------------|-----|
|                    | trans-HONO+HCl                                      | 105 |
| One water molecule | cis-HONO...H <sub>2</sub> O+HCl                     | 157 |
|                    | trans-HONO...H <sub>2</sub> O+HCl                   | 184 |
| Water dimer        | cis-HONO...(H <sub>2</sub> O) <sub>2</sub> -a+HCl   | 137 |
|                    | trans-HONO...(H <sub>2</sub> O) <sub>2</sub> -b+HCl | 187 |
| Water trimer       | cis-HONO...(H <sub>2</sub> O) <sub>3</sub> -a+HCl   | 161 |
|                    | trans-HONO...(H <sub>2</sub> O) <sub>3</sub> -a+HCl | 172 |

## 2. Kinetic computation (KiSThEP)

In order to verify the correctness of the method, we used KiSThEP software to recalculate the reaction rate constant. KiSThEP<sup>[2]</sup> includes the theoretical prediction of canonical and microcanonical rate constants for gas-phase chemical reactions. The methods used are conventional TST or variational transition state theory (VTST), or RRKM theory. One-dimensional quantum mechanical tunneling treatments through Wigner correction or an unsymmetrical Eckart potential energy barrier can also be involved. It is not designed to be comprehensive such as for example the PolyRate or MultiWell programs, but it has been successfully applied to the calculation of the rate constant of gas reaction<sup>[3,4]</sup>.

Based on the potential energy surfaces, the rate constants of the reactions in the aqueous phase were calculated using conventional transition state theory (TST):

$$k^{TST}(T) = \chi(T) \sigma \frac{k_b T}{h} \left( \frac{RT}{P^0} \right)^{\Delta n} e^{-\frac{\Delta G^\ddagger}{k_b T}} \quad (5)$$

$$\Delta G^\ddagger = G_{TS} - G_R \quad (6)$$

$$\chi(T) = 1 + \frac{1}{24} \left| \frac{h\nu^\ddagger}{k_B T} \right|^2 \quad (7)$$

In the formula,  $k_b$ ,  $h$ , and  $R$  are the Boltzmann constant, Planck constant, and gas constant, respectively.  $\Delta G^\ddagger$  is the Gibbs free energy of activation;  $\sigma$  represents the reaction path degeneracy, which accounts for the number of equivalent reaction paths.  $P^0$  and  $T$  are pressure and temperature, respectively.  $\Delta n$  corresponds to  $n-1$  for an  $n$ -molecular reaction, for instance,  $\Delta n$  is 1 for the bimolecular reaction studied herein.  $\chi(T)$  is the quantum mechanical tunneling correction.

**Table S10** Rate constants (in cm<sup>3</sup>molecule<sup>-1</sup>s<sup>-1</sup>) for the HONO+HCl reaction under different conditions with two methods (298K).

| Reaction conditions | Reaction                                            | k (in the article)     | k (KiSThEP)            |
|---------------------|-----------------------------------------------------|------------------------|------------------------|
| No water            | cis-HONO+HCl                                        | 2.93×10 <sup>-25</sup> | 6.94×10 <sup>26</sup>  |
|                     | trans-HONO+HCl                                      | 9.55×10 <sup>-24</sup> | 2.79×10 <sup>-24</sup> |
| One water molecule  | cis-HONO...H <sub>2</sub> O+HCl                     | 3.44×10 <sup>-22</sup> | 8.21×10 <sup>-23</sup> |
|                     | trans-HONO...H <sub>2</sub> O+HCl                   | 4.26×10 <sup>-21</sup> | 1.00×10 <sup>-21</sup> |
| Water dimer         | cis-HONO...(H <sub>2</sub> O) <sub>2</sub> -a+HCl   | 2.27×10 <sup>-19</sup> | 2.31×10 <sup>-20</sup> |
|                     | trans-HONO...(H <sub>2</sub> O) <sub>2</sub> -b+HCl | 2.24×10 <sup>-18</sup> | 1.53×10 <sup>-19</sup> |
| Water trimer        | cis-HONO...(H <sub>2</sub> O) <sub>3</sub> -a+HCl   | 2.12×10 <sup>-23</sup> | 7.05×10 <sup>-24</sup> |

## References

- [1] Xiao F X, Sun X H, Li Z R, et al. Theoretical Study of Radical–Molecule Reactions with Negative Activation Energies in Combustion: Hydroxyl Radical Addition to Alkenes[J]. ACS Omega, 2020, 5(22): 12777-12788.
- [2] Canneaux S, Bohr F, Henon E. KiSTheLP: a program to predict thermodynamic properties and rate constants from quantum chemistry results[J]. Journal of Computational Chemistry, 2013, 35(1): 82-93.
- [3] Chen M, Tong S, Wang Z, et al. Reaction mechanism and kinetics of Criegee intermediate and hydroperoxymethyl formate[J]. Journal of Environmental Sciences, 2021, 105: 128-137.
- [4] Rahbar A, Zahedi E, Aghaie H, et al. DFT Insight into the Kinetics and Mechanism of the OH -initiated Atmospheric Oxidation of Catechol: OH Addition and Hydrogen Abstraction Pathways[J]. ChemistrySelect, 2021, 6(16): 3875-3883.
